# Supplementary material
Source: PubMed Central journal article supplement (PMC5560812)

**DC3000 Duplication rate**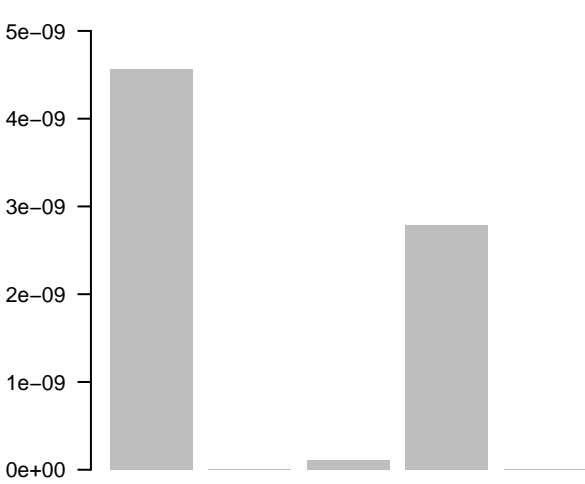**Equilibrium frequencies**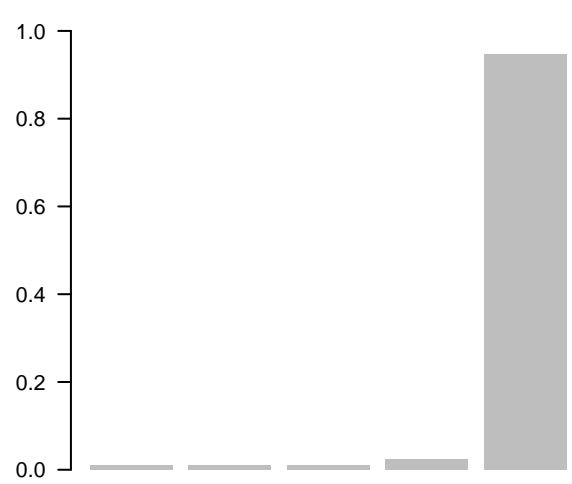**536 Duplication rate**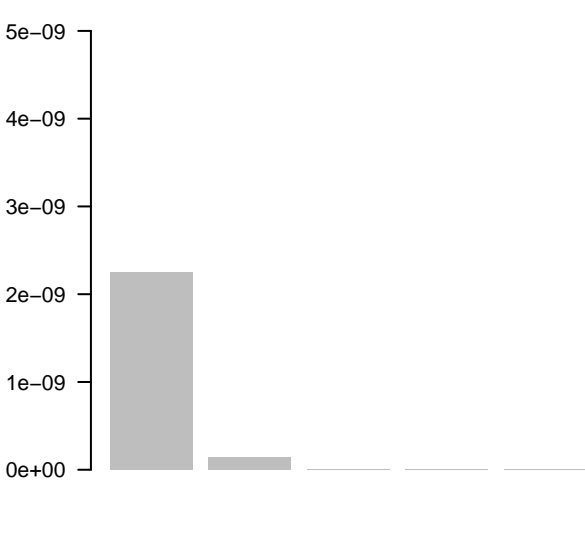**Equilibrium frequencies**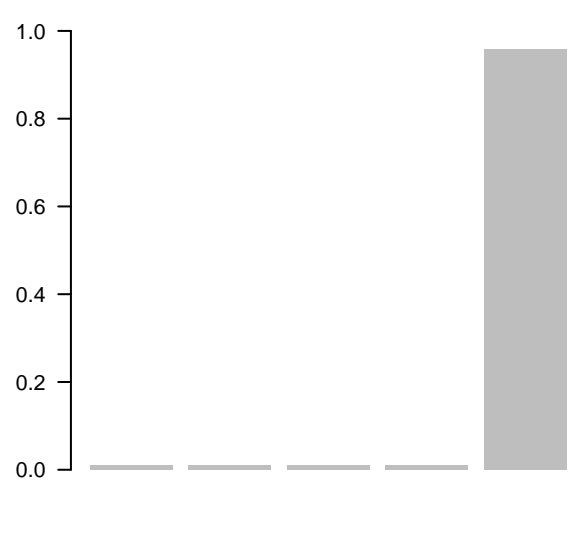**A506 Duplication rate**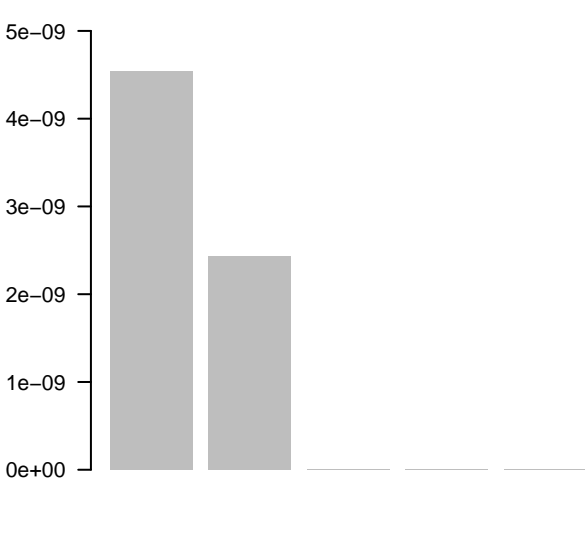**Equilibrium frequencies**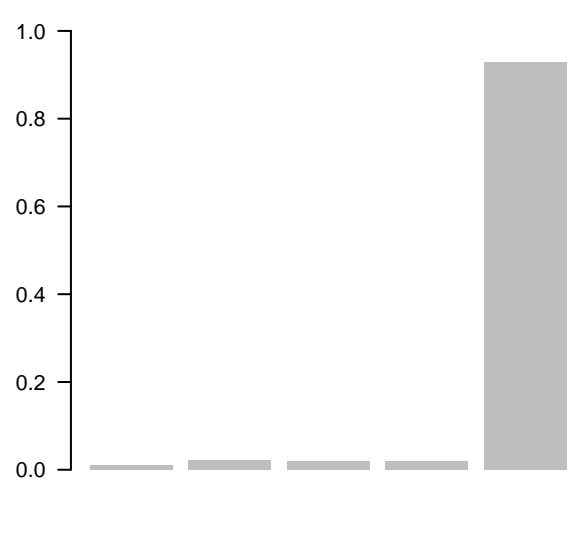**REL606 Duplication rate**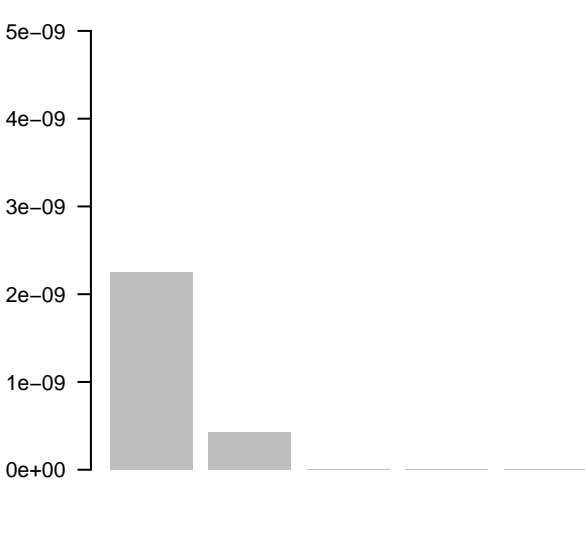**Equilibrium frequencies**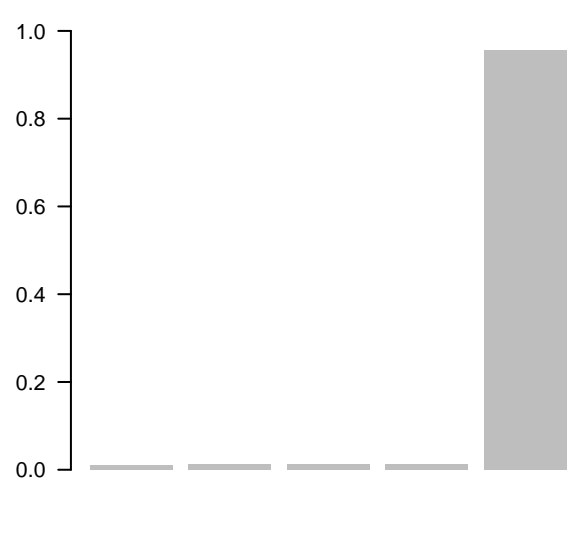**SBW25 Duplication rate**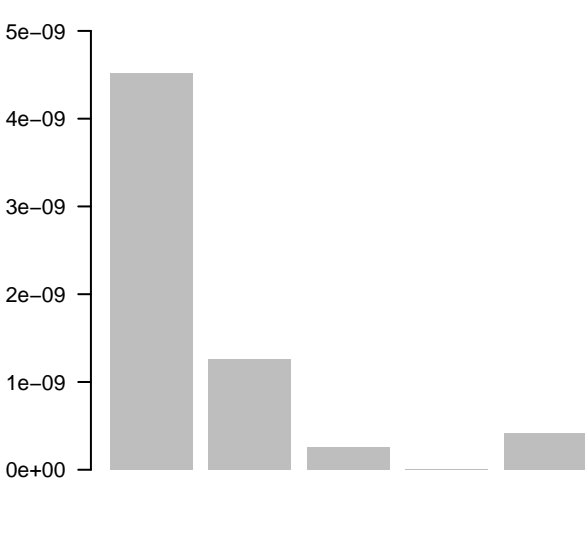**Equilibrium frequencies**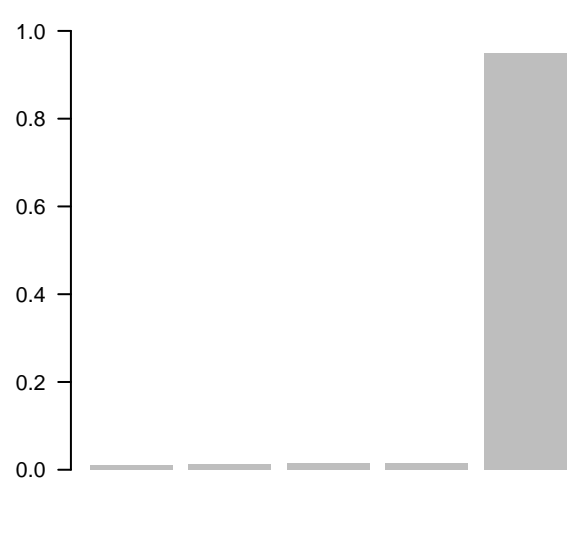**MG1655 Duplication rate**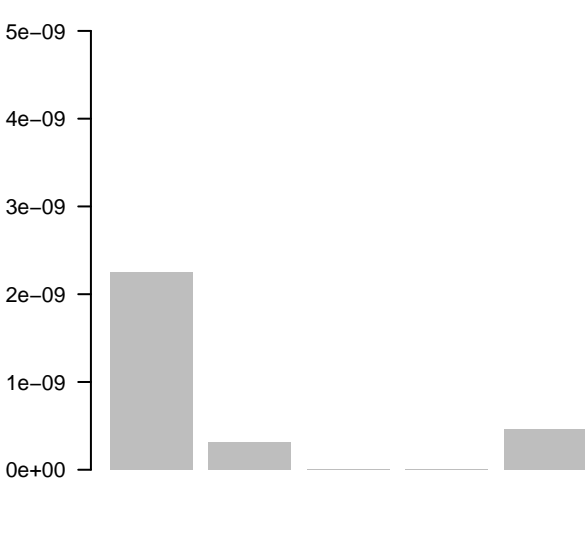**Equilibrium frequencies**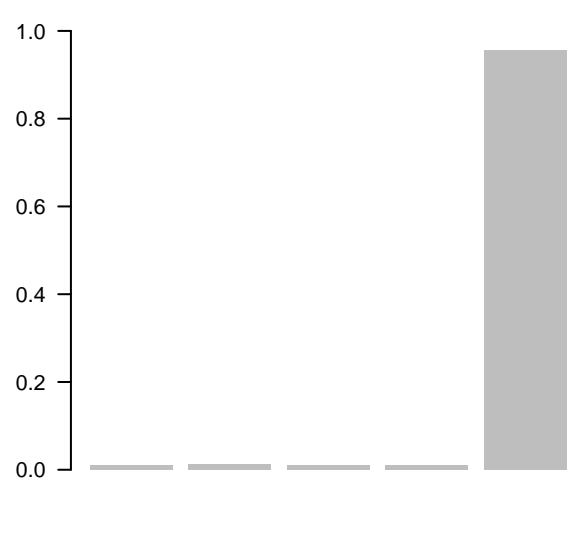**GB1 Duplication rate**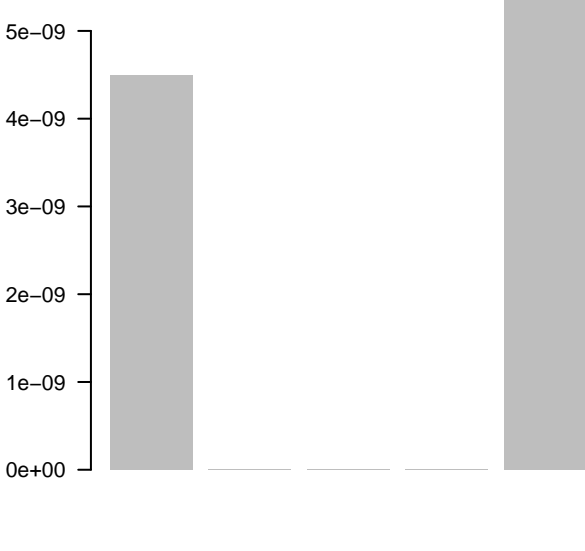**Equilibrium frequencies**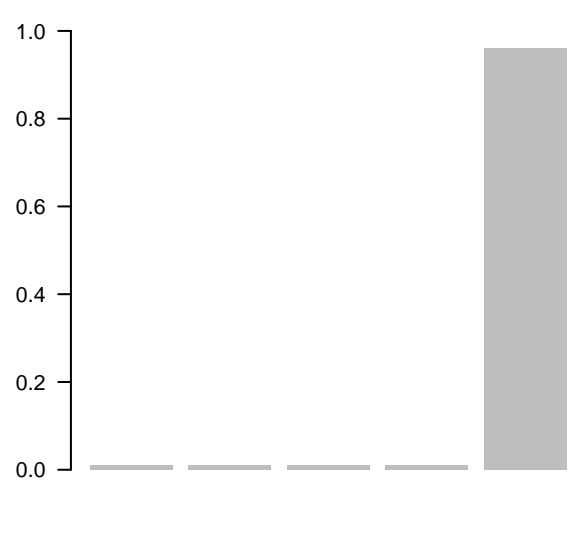**UTI89 Duplication rate**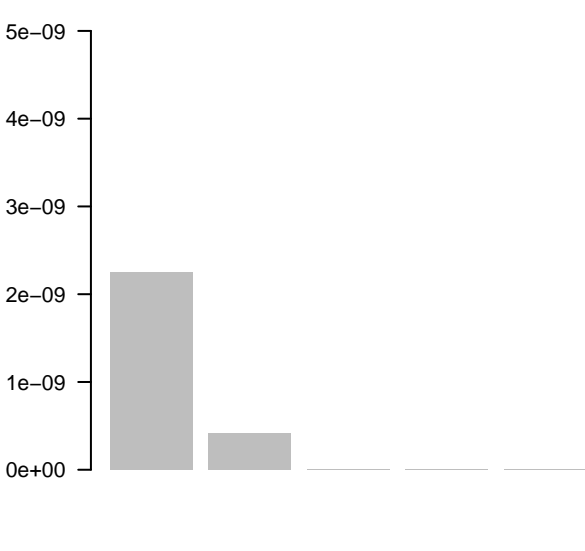**Equilibrium frequencies****UMN026 Duplication rate**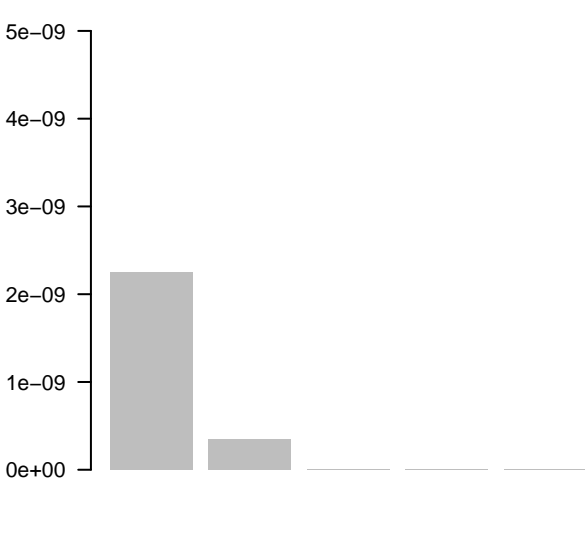**Equilibrium frequencies****BG33R Duplication rate**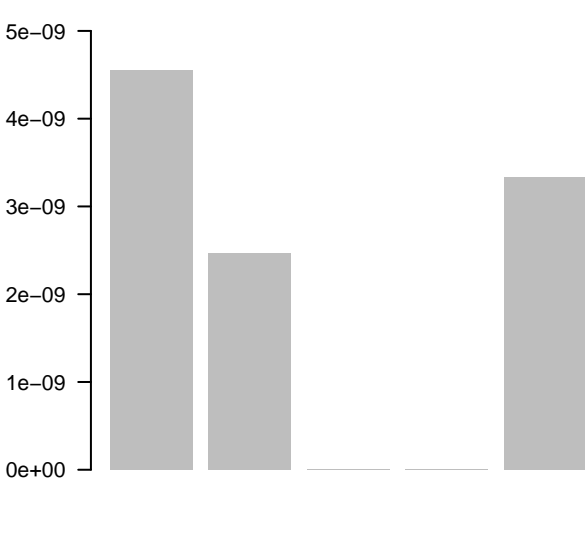**Equilibrium frequencies**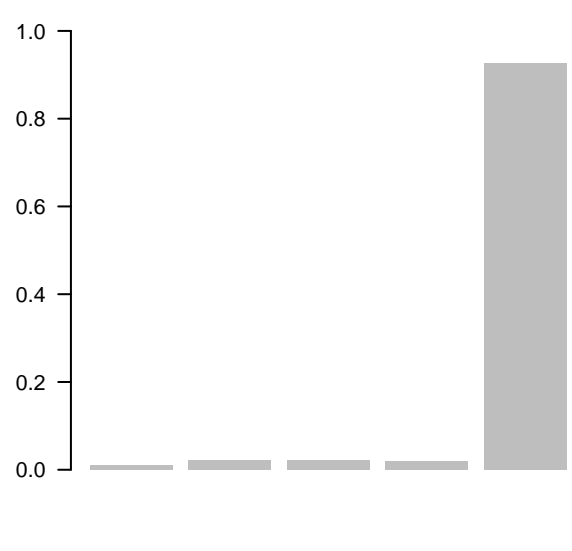

Supplement: 2149FileS5.pdf [file 2149FileS5.pdf]
