# Supplementary material
Source: PubMed Central journal article supplement (PMC5560812)
Supplement: 2149FileS2.pdf [file 2149FileS2.pdf]

**File S2. Most abundant 25bp long sequence their associated RAYT and the number of RAYTs within the genome.**

| Bacterium | Sequence                  | Freq. | Flanking RAYT   | #RAYTs |
|-----------|---------------------------|-------|-----------------|--------|
| GB1       | TGTAGGAGCGGCCTTGTGTCGCGAT | 109   | Pputgb1_0613    | 3      |
| SBW25     | ATGTGGGAGGGGGCTTGCCCCGAT  | 265   | PFLU3939        | 3      |
| DC3000    | GGACGCAGAGCGTCCAGAACGGCAT | 46    | None            | 1      |
| A506      | TGTGGGAGCTGGCTTGCTGCGATA  | 314   | PFLA506_RS09035 | 1      |
| BG33R     | ATGTGGGAGCTGGCTTGCTGCGAT  | 160   | PSEBG33_1863    | 1      |
| MG1655    | GGATAAGGCGTTCACGCCGCATCCG | 75    | yafM            | 1      |
| 536       | GGATAAGGCGTTCACGCCGCATCCG | 52    | ECP_0256        | 1      |
| UMN026    | GGATAAGGCGTTCACGCCGCATCCG | 48    | yafM            | 1      |
| REL606    | GGATAAGGCGTTCACGCCGCATCCG | 72    | yafM            | 1      |
| UTI89     | CGGATAAGGCGTTCACGCCGCATCC | 43    | yafM            | 1      |
