# Supplementary material
Source: PubMed Central journal article supplement (PMC5560812)
Supplement: 2149FileS7.pdf [file 2149FileS7.pdf]

# *Bertels et al., Discovering complete quasispecies in bacterial genomes*

## Supplementary Information

---

### Defining functions and importing data

#### Functions and definitions

Function that calculates equilibrium frequencies for a given set of fitness values and a given mutation matrix

```
CalculateEquilibriumFrequencies[fitness_, mutmatrix_] :=  
  Module[{},  
    W := Transpose[mutmatrix fitness];  
    ESys := Eigensystem[W];  
    sorted = Sort[ESys];  
    Return[sorted[[2, 1]]/Total[sorted[[2, 1]]];  
  ];
```

Functions that calculate the mutation matrix.

```

(*calculate mutation rate for a single entry in the mutation matrix*)
entry[i_, j_, u_, L_] := Module[{backMutation, forwardMutation, maintain},
  backMutation = (i - 1) * u / 3; (* non-zero back mutation rate*)
  (*backMutation=0; (*0 back mutations*)*)
  forwardMutation = u * L - (i - 1) u / 3;
  (* forward mutation rate with non-zero back mutation rate*)
  (*forwardMutation=u*L;(*for 0 back mutations*)*)
  maintain = 1 - backMutation - forwardMutation;
  Return[If[i == j, maintain,
    If[i == j + 1, backMutation, If[i == j - 1, forwardMutation, 0]]]];
];
makeMutMatrix[u_, L_, mutclasses_] := Module[{matrix},
  matrix = Table[entry[i, j, u, L], {i, 1, mutclasses}, {j, 1, mutclasses}];
  (*matrix[[mutclasses,mutclasses]]=1-matrix[[mutclasses,mutclasses-1]];*)
  matrix[[mutclasses, mutclasses - 1]] = 0;
  (*no back mutations for the last mutation class*)
  matrix[[mutclasses, mutclasses]] = 1;
  (*once a sequence reaches the last mutation class it will stay there*)
  Return[matrix];
];

```

Function that calculates the fitness values from the equilibrium frequencies with a given mutation matrix.

```

CalculateFitness[frequencies_, mutmatrix_, mutclasses_, name_, u_] :=
Module[{x, f, farray, q,  $\phi$ , equilibriumEq, eqs, s, min, fitnessTable, i, j},
  x = frequencies; (*frequencies of the different mutation classes*)

  fmutclasses-1 = 1; (*set the frequency of the lowest mutation class to 1*)
  farray = Table[fi-1, {i, 1, mutclasses}];
  q = mutmatrix; (*the mutation matrix is called q*)

   $\phi$ [x_, f_] :=  $\sum_{i=1}^{\text{mutclasses}} (x[[i]] f[[i]])$ ; (* $\phi$  for no back mutations*)

  equilibriumEq[i_] := - $\phi$ [x, farray] * x[[i]] +  $\sum_{j=1}^{\text{mutclasses}} (x[[j]] farray[[j]] q[[j, i]])$ ;
  eqs = Table[0 == equilibriumEq[i], {i, 1, mutclasses}];

  (*Solve quasispecies model for fitness*)
  s = NSolve[eqs, farray[[1 ;; mutclasses - 1]]];

  (*if there are fitness values below one; scale these to one*)
  min = Min[Table[s[[1]][[j]][[2]], {j, 1, mutclasses - 1}], 1];

  fitnessTable = Table[s[[1]][[j]][[2]]/min, {j, 1, mutclasses - 1}];
  fitnessTable = Append[fitnessTable, 1/min];
  (*add mutation rate to output*)
  fitnessTable = Append[fitnessTable, u];
  (*add observed frequencies to output*)
  For[j = 1, j ≤ mutclasses, j++,
    fitnessTable = Append[fitnessTable, x[[j]] // N];
  ];

  fitnessTable = Append[fitnessTable, name];
  Return[fitnessTable];
];

```

Function that processes the input data (i.e. sequence frequencies) and varies the frequencies of the last mutation class by “var”.

```

ProcessData[realFreqs_, var_] := Module[{inner, realTab, names, seqLength, temp},

  j = 0;
  i = 0;
  realTab = {};
  inner = {};
  names = {};
  seqLength = {};

  While[i < Length[realFreqs],
    i++;
    j = 0;
    inner = {realFreqs[[i + j]][[3]]};

    While[
      i + j < Length[realFreqs] && realFreqs[[i + j]][[1]] == realFreqs[[i + j + 1]][[1]],
      j++;
      inner = Append[inner, realFreqs[[i + j]][[3]]];
    ];
    (*if there is not enough data add 1s to REPIN population count,
    CAUTION: THIS WILL SIGNIFICANTLY ALTER THE DATA,
    WE ONLY ADDED THIS FOR CONSISTENCY REASONS
    It may be better to reduce the number of mutation
    classes if this is an issue.*)
    While[Length[inner] < mutclasses, inner = Append[inner, 1]];

    (*vary the last mutation class by "var"
    This demonstrates the effect small variations in the
    last mutation class have on the inferred fitness values.*)
    For[k = -var, k ≤ var, k++,
      temp = inner;
      temp[[Length[temp]]] = temp[[Length[temp]]] + k;
      If[temp[[Length[temp]]] > 0,
        realTab = Append[realTab, temp];
        names = Append[names, realFreqs[[i]][[1]];
        seqLength = Append[seqLength, realFreqs[[i]][[4]];
      ];
    ];

    i = i + j;

  ];

  names = StringReplace[names, "_largestCluster" → ""];

  Return[{realTab, seqLength, names}];
];

```

Number of sequence classes is given by *mutclasses*

```
mutclasses = 6;  
(*var=0 is the default,  
which will only infer fitness values for the provided dataset;  
larger values of var will add fitness inferences to the results  
where all integer values up to var are added or subtracted. *)  
var = 0;
```

Following *Wielgoss et al. 2011* the mutation rate in *E. coli* is set to  $u$

```
u = 8.9 × 10-11;
```

## Importing data

Next we import the sequence frequencies from the real data. The format of the imported data is in the form of a table with three columns, each referring to

1. Organism name
2. Sequence Class
3. Sequence Frequency

```

realFreqs = Import[NotebookDirectory[] <> "File_S9.txt", "Table"];
data = ProcessData[realFreqs, var];
realTab = data[[1]];
names = data[[3]]; (*organism names*)
seqLength = data[[2]];
(*calculate relative frequencies from absolute frequencies*)
freqs = Table[realTab[[i]]/Total[realTab[[i]], {i, 1, Length[realTab]}];

i = 0;
newf = {};
While[i < Length[freqs],
  i++;
  j = 0;
  inner = {};
  While[j < mutclasses - 1,
    j++;
    inner = Append[inner, freqs[[i, j]]];
  ];
  (*if there are more entries than mutation classes then add
  all remaining entries and put them in the last mutation class*)
  last = Sum[freqs[[i, j], {j, mutclasses, Length[freqs[[i]]}]];
  inner = Append[inner, last];

  newf = Append[newf, inner];
]
freqs = newf;

```

---

## Model

### Solving for the equilibrium frequencies of the mutation classes.

The fitness of the mutation classes is given by the fitnessTable.

```

outputUnscaled = {};
For[i = 1, i ≤ Length[freqs], i++,
  L = seqLength[[i]];
  (*sequence length, which is different for different data sets*)
  q = makeMutMatrix[u, L, mutclasses];
  (*the mutation matrix also differs due to different sequence lengths *)

  (*equilibrium frequencies x*)
  x = Table[freqs[[i, j]], {j, 1, Length[freqs[[i]]}]];

  fitnessTable = CalculateFitness[x // N, q, mutclasses, names[[i], u];

  fitnessTable = Append[fitnessTable, seqLength[[i]];
  outputUnscaled = Append[outputUnscaled, fitnessTable];

]

```

## Exporting raw output and scaled with mutation rate

```

Export[NotebookDirectory[] <>
  "quasispecies_fitness_unscaled_" <> ToString[mutclasses] <>
  "_" <> ToString[var] <> ".txt", outputUnscaled, "Table"];

```

## What does scaling do?

If we want to determine the fitness values that give us comparable results but for a higher mutation rate then we need to do the following:

1. Calculate the number of generations one time step at the new mutation rate corresponds to under the old mutation rate.

```

(*scale results for a mutation rate of 10-4*)
newU = 10-4;
gens = newU / u;
(*calculate new fitness values*)

```

2. Scale up each fitness value by the number of generations we calculated above and calculate the new equilibrium frequencies for the new mutation rate.

```

output = outputUnscaled;
For[i = 1, i <= Length[freqs], i++,
  fitness = {};
  For[j = 1, j <= mutclasses, j++,
    newFit = output[[i]][j]gens;
    output[[i]][j] = newFit;
    fitness = Append[fitness, newFit];
  ];
output[[i]][[mutclasses + 1]] = newU // N;
(*calculate new equilibrium frequencies for the new fitness values*)

eqfreqs = CalculateEquilibriumFrequencies[
  fitness, makeMutMatrix[newU, seqLength[[i]], mutclasses]];

For[j = 1, j <= mutclasses, j++,
  k = mutclasses + 1;

  output[[i]][[k + j]] = eqfreqs[[j]];
];
]
(*output the scaled fitness values and equilibrium frequencies*)
Export[NotebookDirectory[] <> "quasispecies_fitness_" <>
  ToString[mutclasses] <> "_" <> ToString[var] <> ".txt", output, "Table"];

```

### Calculate error thresholds

For each species we will calculate the fitness value, at which the frequency of the master sequence drops below 1% by depressing the whole fitness landscape in increments of  $10^{-12}$ .



```

error = outputUnscaled;
For[i = 1, i ≤ Length[freqs], i++,

(*equilibrium frequencies*)

q = makeMutMatrix[u, seqLength[[i]], mutclasses];
f = Table[outputUnscaled[[i]][j], {j, 1, mutclasses}];
start = IntegerPart[(f[[1]] - 1) * 10^12];
threshold = 0.01;

For[j = 1, j < start, j++,
  fint = Table[IntegerPart[(f[[i]] - 1) * 10^12], {i, 1, mutclasses}];

  For[k = 2, k ≤ mutclasses, k++,
    If[fint[[k]] > 0, f[[k]] = 1 + (fint[[k]] - 1) * 10^-12];
  ];

  f[[1]] = 1 + (start - j) 10^-12;

  effreqs = CalculateEquilibriumFrequencies[f, q];

  If[effreqs[[1]] < threshold,
    j = start;
  ];

];

For[j = 1, j < Length[f], j++,
  error[[i]][j] = f[[j]] // N;

];
For[j = 1, j ≤ mutclasses, j++,
  k = mutclasses + 1;

  error[[i]][k + j] = effreqs[[j]];
];
]

Export[NotebookDirectory[] <> "error_threshold_" <>
  ToString[mutclasses] <> "_" <> ToString[var] <> ".txt", error, "Table"];

```
