# Supplementary material
Source: PubMed Central journal article supplement (PMC5560812)

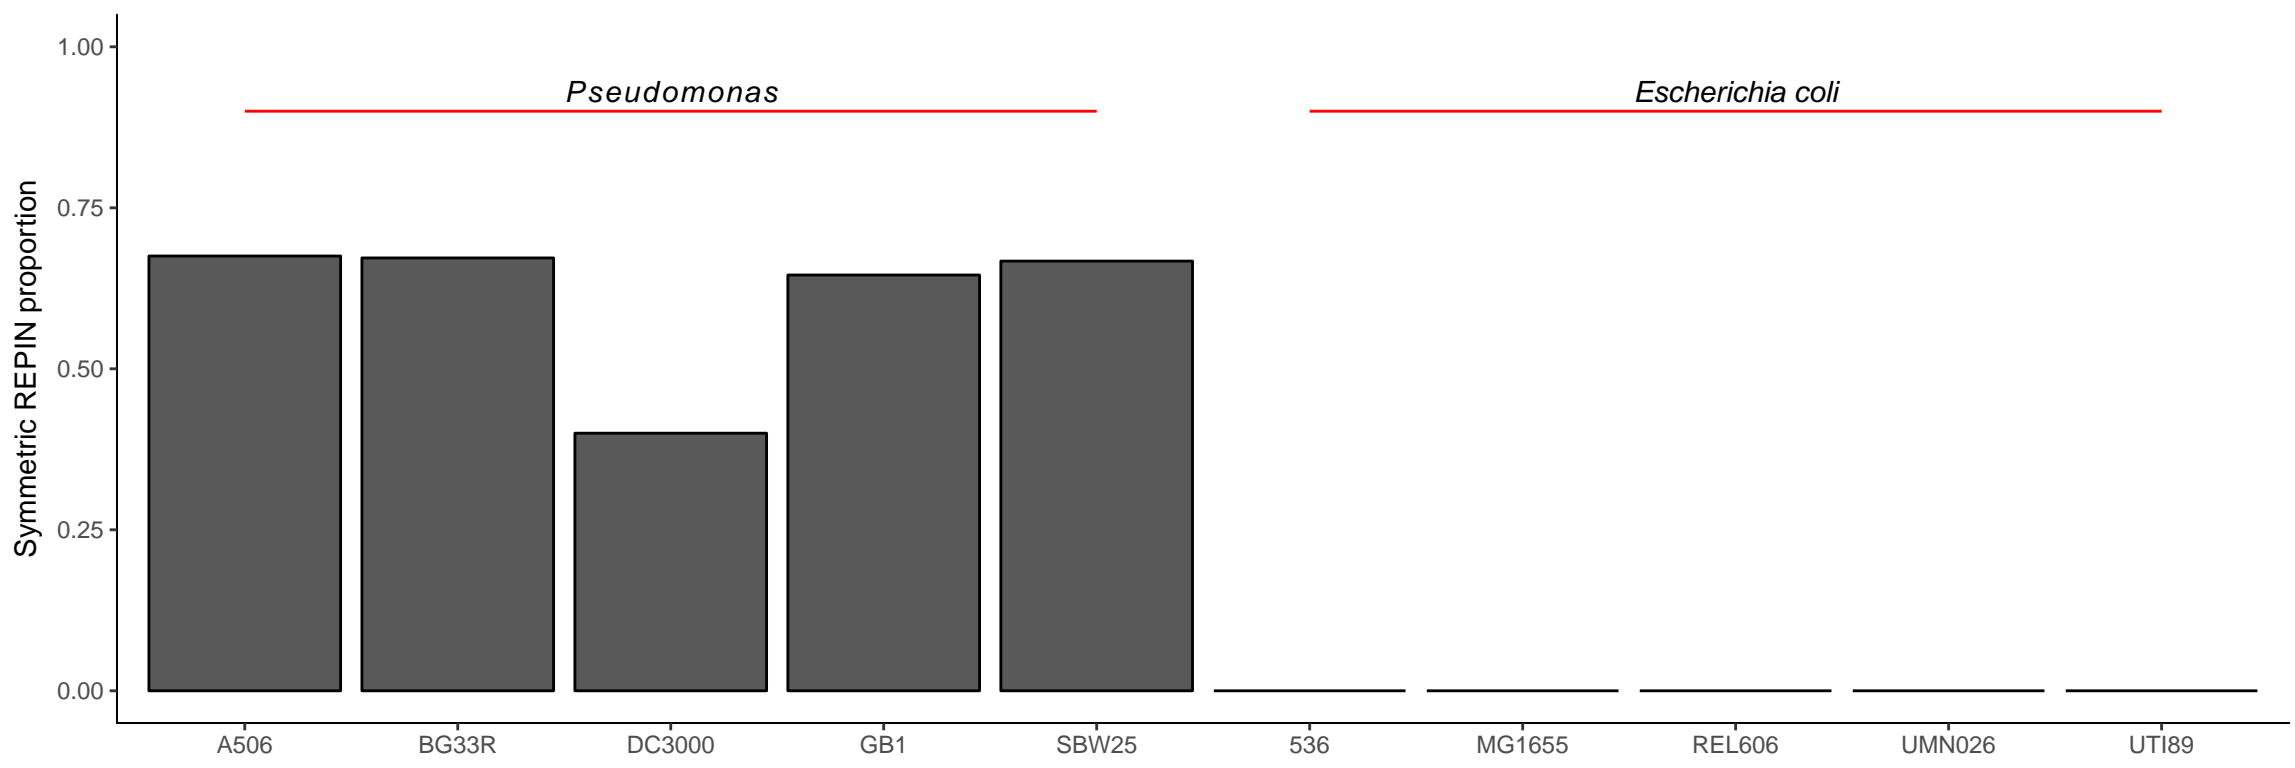

Supplement: 2149FileS4.pdf [file 2149FileS4.pdf]
